# Supplementary material
Source: PubMed Central journal article supplement (PMC164605)

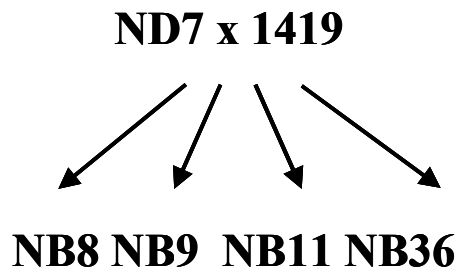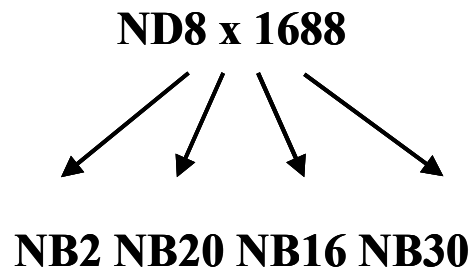

**NB8 x NB2 = Fam 1 (n = 39)**

**NB9 x NB20 = Fam 2 (n = 26)**

**NB11 x NB16 = Fam 5 (n = 22)**

**NB36 x NB30 = Fam 6 (n = 22)**

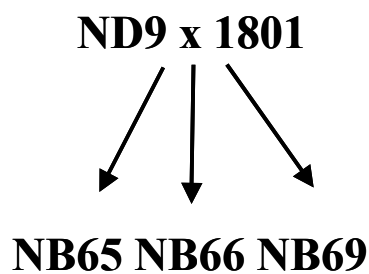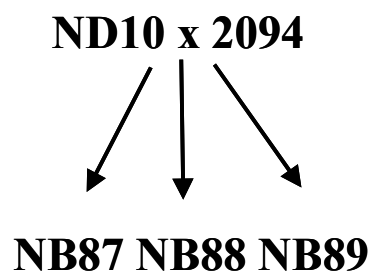

**NB66 x NB87 = Fam 3 (n = 21)**

**NB66 x NB88 = Fam 4 (n = 23)**

**NB69 x NB89 = Fam 7 (n = 24)**

Supplement: pnas_1232392100_2.pdf [file pnas_1232392100_2.pdf]
